# Supplementary material
Source: publisher figshare collection journal article supplement (https://frontiersin.figshare.com/ndownloader/files/17961764)
Supplement: Supplementary file 1 [file 17961764]

Section 1: Consumer Knowledge

***For the following questions, please check all responses that apply unless otherwise noted***

1. Survey location?

- ☐ MSU Family Night
- ☐ Livingston Food Resource Center
- ☐ Heebs Fresh Market
- ☐ Bozeman Winter Farmers' Market
- ☐ Other (please specify)

2. Survey date

3. In what range is your current age?

- ☐ 18-37 years
- ☐ 38-54 years
- ☐ 55-73 years
- ☐ 74-92 years
- ☐ 93 years and greater

4. In the past, have you received any information regarding lentils from the following people?

- ☐ Family and/or friends
- ☐ Community programs / extension
- ☐ Health magazines
- ☐ Local food coop
- ☐ Farmers Market
- ☐ Supermarket
- ☐ Farmers
- ☐ Doctor/dietician
- ☐ Dietary guidelines
- ☐ The internet
- ☐ Other. Please specify

What did you learn?

5. Please select all of the following statements that you AGREE WITH regarding your knowledge and perceptions on lentils.

- ☐ I feel knowledgeable regarding the nutrient benefits of lentils
- ☐ I feel knowledgeable regarding how to incorporate lentils into my diet in a nutritionally balanced way
- ☐ I feel knowledgeable regarding how to cook with lentils
- ☐ I feel knowledgeable about how to use the different types of lentils in a variety of dishes
- ☐ I generally find the taste of lentils as desirable
- ☐ Lentils and other pulses are considered both a vegetable and protein by the Dietary Guidelines for Americans 2015

6. Indicate your agreement with the following statements regarding eating lentils (please select best response)

|                                                                    | Strongly Agree           | Agree                    | Neither<br>disagree/agree | Disagree                 | Strongly disagree        |
|--------------------------------------------------------------------|--------------------------|--------------------------|---------------------------|--------------------------|--------------------------|
| Lentils can help improve nutrition                                 | <input type="checkbox"/> | <input type="checkbox"/> | <input type="checkbox"/>  | <input type="checkbox"/> | <input type="checkbox"/> |
| Lentils can help to feel satiated or full                          | <input type="checkbox"/> | <input type="checkbox"/> | <input type="checkbox"/>  | <input type="checkbox"/> | <input type="checkbox"/> |
| Lentils can help lower bad cholesterol                             | <input type="checkbox"/> | <input type="checkbox"/> | <input type="checkbox"/>  | <input type="checkbox"/> | <input type="checkbox"/> |
| Lentils can help maintain or control a healthy blood sugar content | <input type="checkbox"/> | <input type="checkbox"/> | <input type="checkbox"/>  | <input type="checkbox"/> | <input type="checkbox"/> |
| Lentils can help maintain or promote a healthy digestive tract     | <input type="checkbox"/> | <input type="checkbox"/> | <input type="checkbox"/>  | <input type="checkbox"/> | <input type="checkbox"/> |
| Lentils can help benefit the diet of those with diabetes           | <input type="checkbox"/> | <input type="checkbox"/> | <input type="checkbox"/>  | <input type="checkbox"/> | <input type="checkbox"/> |
| Lentils can benefit weight loss efforts or help with weight loss   | <input type="checkbox"/> | <input type="checkbox"/> | <input type="checkbox"/>  | <input type="checkbox"/> | <input type="checkbox"/> |
| Lentils can produce gas                                            | <input type="checkbox"/> | <input type="checkbox"/> | <input type="checkbox"/>  | <input type="checkbox"/> | <input type="checkbox"/> |
| Lentils can help reduce cancer risk                                | <input type="checkbox"/> | <input type="checkbox"/> | <input type="checkbox"/>  | <input type="checkbox"/> | <input type="checkbox"/> |
| Lentils can support plant-based diets                              | <input type="checkbox"/> | <input type="checkbox"/> | <input type="checkbox"/>  | <input type="checkbox"/> | <input type="checkbox"/> |

Section 2: Food security status

**The following are two screening questions for food insecurity from the US Department of Agriculture's Core Food Security Module:**

**Below are statements that people have made about their food situation. For these statements, please check whether the statement was often true, sometimes true, or never true for (you/your household) in the last 12 months – that is, since last (January 2018).**

7. The first statement is 'We worried whether (my/our) food would run out before (I/we) got money to buy more.' Was that often true, sometimes true, or never true for (you/your household) in the last 12 months?

- ☐ Often True
- ☐ Sometimes true
- ☐ Never True

8. The second statement is 'The food that (I/we) bought just didn't last and (I/we) didn't have money to get more.' Was that often true, sometimes true, or never true for (you/your household) in the last 12 months?

- ☐ Often True
- ☐ Sometimes true
- ☐ Never True

Section 3: A comparison of animal-based protein and lentils

Given the information provided on the lentil brochure, please answer the following questions.

9. Based on the provided environmental information on protein production, would you change the amount and / or frequency in which you consume lentils?

- ☐ I would **increase** the amount / frequency
- ☐ I would **decrease** the amount / frequency
- ☐ I would **not change** the amount / frequency
- ☐ I am **not sure**

10. Based on the provided cost information on protein production, would you change the amount and / or frequency in which you consume lentils?

- ☐ I would **increase** the amount / frequency
- ☐ I would **decrease** the amount / frequency
- ☐ I would **not change** the amount / frequency
- ☐ I am **not sure**

11. Based on the provided nutrient information on protein production, would you change the amount and / or frequency in which you consume lentils?

- ☐ I would **increase** the amount / frequency
- ☐ I would **decrease** the amount / frequency
- ☐ I would **not change** the amount / frequency
- ☐ I am **not sure**

12. Is there any other information about lentils that you would like to share that we did not ask about?
